# Supplementary material for: Negative Linear Compressibility of Formate Crystals from the Viewpoint of Quantum Electronic Pressure
Source: MDPI journal article supplement (doi:10.3390/cryst13071147), 2023-07-23
Supplement: s1 [file s1]

## Negative Linear Compressibility of Formate Crystals from the Viewpoint of Quantum Electronic Pressure

*Y.V. Matveychuk, S.A. Sobalev, P.I. Borisova, E.V. Bartashevich, V.G. Tsirelson*

For a small deformations of 3D solid, the generalized Hooke's law, presented in tensor form and relating the components of the stress tensors  $\sigma_{ij}$  and strain tensors  $\varepsilon_{ij}$ , is valid. The stiffness tensor (tensor of elastic constants),  $c_{ijkl}$ , inverse to the tensor of elastic moduli,  $S_{ijkl}$ , is more convenient for the analysis of elastic properties of solid, read as [1]:

$$\sigma_{ij} = \sum_{k=1}^3 \sum_{l=1}^3 c_{ijkl} \varepsilon_{kl}, \quad i, j = 1, 2, 3. \quad (S1)$$

Linear compressibility is obtained by applying an isotropic stress that corresponds to pressure  $p$ , in such a way that in tensor form  $\varepsilon_{ij} = -p S_{ijkl}$ , and considering that the stretch in a certain direction is  $\varepsilon_{ij} a_i a_j$ , written in vector form as

$$\beta(\theta, \varphi) = S_{ijkl} a_i a_j \quad (S2)$$

где  $i, j, k$  – indices of the tensor component corresponding to the certain direction.

To analyze the stiffness tensor and calculate the spatial dependences of elastic moduli, the online tool ELATE [2] was developed. ELATE uses a 6x6 symmetric matrix of stiffness tensor components in Voigt notation, expressed in GPa, as input. Initially, the tool calculates and displays the generalized mechanical properties: bulk modulus, Young's modulus, shear modulus and Poisson's ratio according to the averaging schemes of Voigt, Reuss and Hill. It also calculates six eigenvalues of the stiffness tensor to test the condition of structure mechanical stability. Linear compressibility can be represented as a 3D parametric surface. ELATE allows to visualize the dependence of a modulus value on a spatial direction in which it is measured, as well as their 2D representations in the (xy), (xz), (yz) planes.

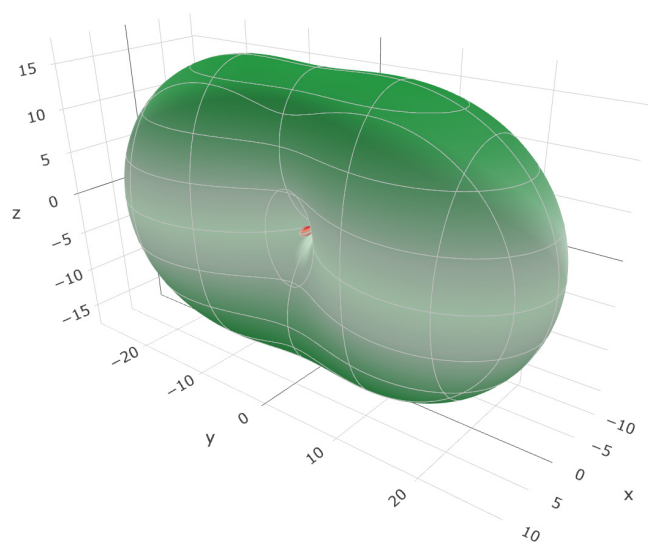

a)

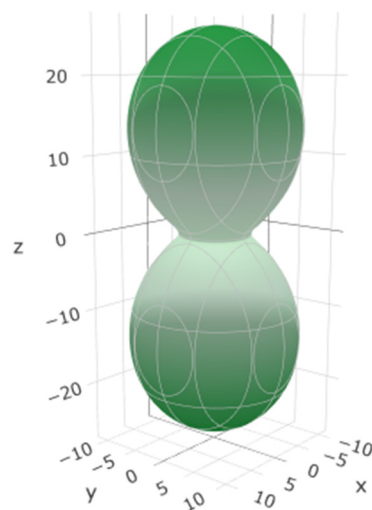

b)

Figure S1. Spatial dependencies of linear compressibility for the calcium formate  $\alpha$ -phase crystals (a) and calcium formate  $\beta$ -phase crystals (b). All axes in  $\text{TPa}^{-1}$ .

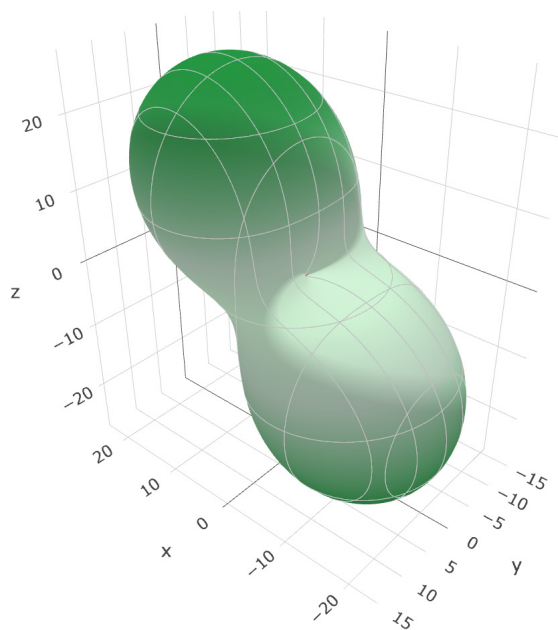

a)

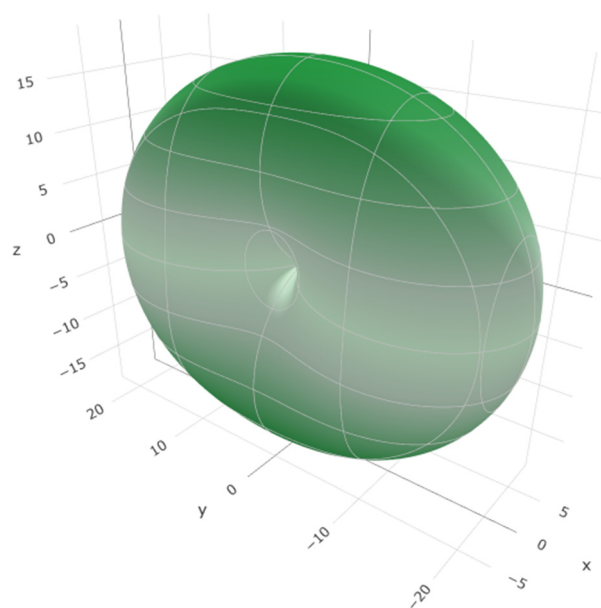

b)

Figure S2. Spatial dependencies of linear compressibility for the cadmium formate crystals (a) and sodium formate crystals (b). All axes in  $\text{TPa}^{-1}$ .

Table S1. Comparison of the experimental and calculated crystal cell parameters for the equilibrium forms of considered crystals.

| Crystal form                                   | SG                               | a, Å  | b, Å  | c, Å  | $\beta$ | $V_{\text{cell}}, \text{\AA}^3$ | RMSD, Å |
|------------------------------------------------|----------------------------------|-------|-------|-------|---------|---------------------------------|---------|
| $\alpha$ -calcium formate (exp, CSD) [3]       | Pcab                             | 10.16 | 13.38 | 6.27  | 90      | 852.8                           | 0.19    |
| $\alpha$ -calcium formate (calc)               |                                  | 10.52 | 13.00 | 6.20  | 90      | 847.7                           |         |
| Cadmium formate (exp) [4]                      | C2/c                             | 11.61 | 6.19  | 12.41 | 112.5   | 823.5                           | 0.26    |
| Cadmium formate (calc)                         |                                  | 12.03 | 6.09  | 12.56 | 117.2   | 818.2                           |         |
| Cadmium formate (calc with pob-DZVP basis set) |                                  | 11.97 | 6.04  | 12.38 | 116.0   | 804.6                           | 0.24    |
| Sodium formate (exp) [5]                       | C2/c                             | 6.24  | 6.75  | 6.10  | 116.6   | 229.5                           | 0.04    |
| Sodium formate (calc)                          |                                  | 6.16  | 6.90  | 6.05  | 117.1   | 228.9                           |         |
| $\beta$ -calcium formate (exp) [6]             | P4 <sub>1</sub> 2 <sub>1</sub> 2 | 6.78  | 6.78  | 9.45  | 90      | 434.0                           | 0.19    |
| $\beta$ -calcium formate (calc)                |                                  | 6.90  | 6.90  | 9.06  | 90      | 430.9                           |         |

Note. RMSD is the standard deviation of the calculated atoms coordinates in a crystal cell from the experimental data.

Table S2. Comparison of the mechanical characteristics of the equilibrium forms of considered crystals.

| Crystal                                    | Bulk modulus<br>K, GPa | $LC_{\text{min}},$<br>$\text{TPa}^{-1}$ | $LC_{\text{max}},$<br>$\text{TPa}^{-1}$ | $LC_{\text{N}}(\text{min})$ |           | $LC_{\text{N}}(\text{max})$ |          |
|--------------------------------------------|------------------------|-----------------------------------------|-----------------------------------------|-----------------------------|-----------|-----------------------------|----------|
|                                            |                        |                                         |                                         | calc                        | exp       | calc                        | exp      |
| $\alpha$ -calcium formate (calc)           | 27.8                   | -3.29                                   | 27.33                                   | -0.09                       | -0.21 [7] | 0.76                        | 0.74 [7] |
| Cadmium formate (calc)                     | 28.7                   | -1.23                                   | 30.32                                   | -0.04                       | -0.26 [7] | 0.87                        | 1.06 [7] |
| Cadmium formate (calc, pob-DZVP basis set) | 29.5                   | -3.82                                   | 36.24                                   | -0.11                       |           | 1.07                        |          |
| Sodium formate (calc)                      | 27.6 (26.0 [8])        | -0.04                                   | 21.73                                   | -0.001                      |           | 0.60                        |          |
| $\beta$ -calcium formate (calc)            | 33.2                   | 4.66                                    | 26.13                                   | 0.15                        |           | 0.87                        |          |

Note.  $LC_{\text{N}}(\text{min})$  and  $LC_{\text{N}}(\text{max})$  are the minimal and maximal linear compressibility, normalized with respect to the bulk compressibility  $LC_{\text{V}}$ :  $LC_{\text{N}}(\text{min}) = LC_{\text{min}}/LC_{\text{V}}$  and  $LC_{\text{N}}(\text{max}) = LC_{\text{max}}/LC_{\text{V}}$ , where  $LC_{\text{V}} = 1000/K \text{ TPa}^{-1}$ , K – bulk modulus in GPa.

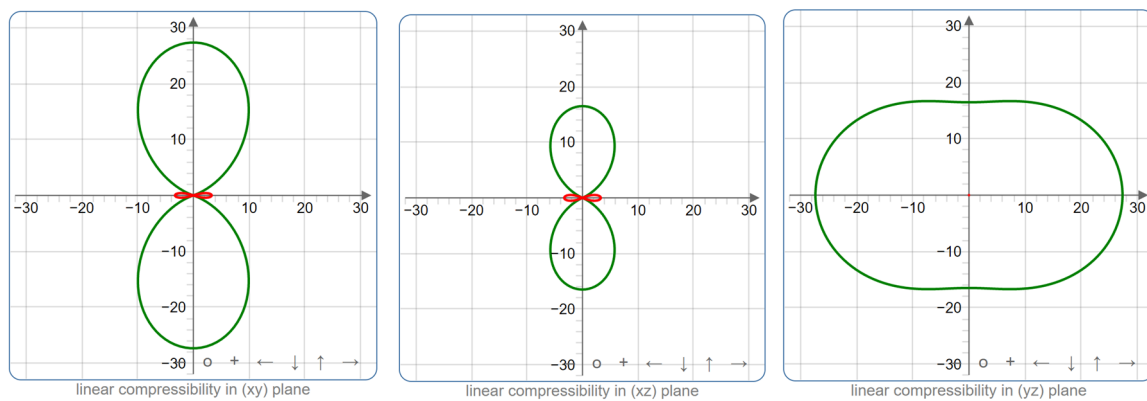

(a)

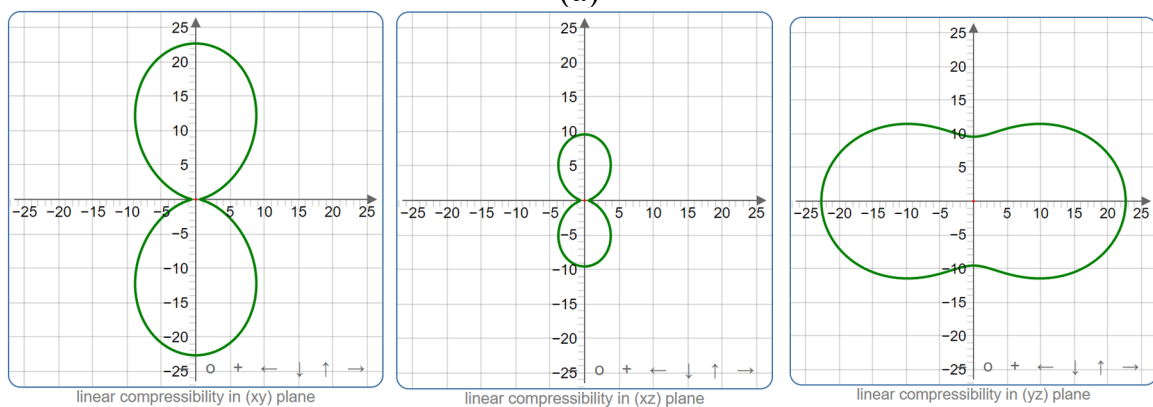

(b)

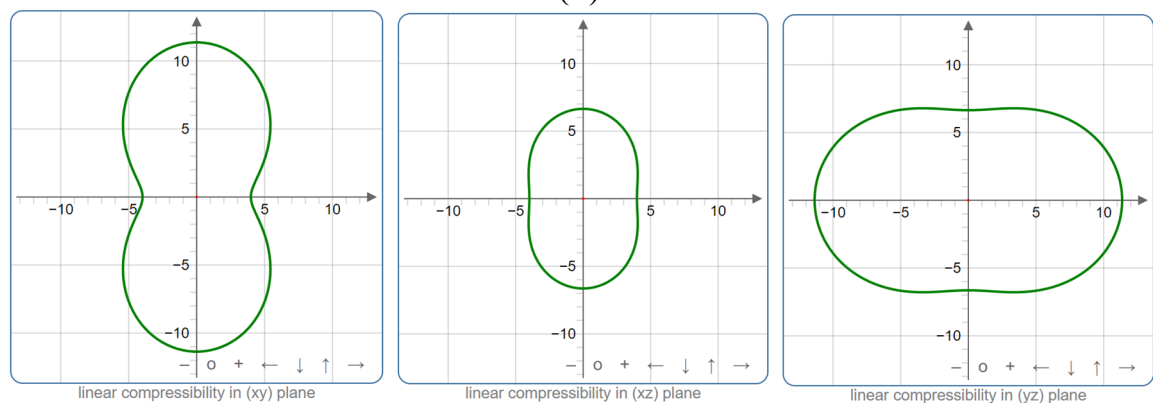

(c)

Figure S3. Change of the spatial dependences of linear compressibility for the calcium formate  $\alpha$ -phase crystals under increasing pressure: a) 0 GPa; b) 3.25 GPa; c) 4.75 GPa. All axes in  $\text{TPa}^{-1}$ .

Table S3. Change of crystal cell parameters of the calcium formate  $\alpha$ -phase crystals at hydrostatic compression.

| Pressure, GPa | a, Å    | b, Å    | c, Å   | V <sub>cell</sub> , Å <sup>3</sup> |
|---------------|---------|---------|--------|------------------------------------|
| 0             | 10.5198 | 13.0026 | 6.1972 | 847.6759                           |
| 1             | 10.5433 | 12.6931 | 6.1099 | 817.6674                           |
| 2             | 10.5535 | 12.4461 | 6.0391 | 793.2335                           |
| 3             | 10.5591 | 12.2234 | 5.9794 | 771.7552                           |
| 3.25          | 10.5607 | 12.1619 | 5.9658 | 766.2412                           |
| 3.5           | 10.5603 | 12.0782 | 5.9537 | 759.3908                           |
| 4             | 10.5475 | 11.9561 | 5.9303 | 747.8522                           |
| 4.75          | 10.5211 | 11.8449 | 5.9009 | 735.3813                           |
| 5             | 10.5120 | 11.8125 | 5.8924 | 731.6716                           |
| 6             | 10.4749 | 11.6989 | 5.8606 | 718.1908                           |

Table S4. Linear compressibility and bulk modulus values of the calcium formate  $\alpha$ -phase crystals at hydrostatic compression.

| Pressure, GPa | Bulk modulus, GPa | LC <sub>min</sub> , TPa <sup>-1</sup> | LC <sub>max</sub> , TPa <sup>-1</sup> | A <sub>LC</sub> |
|---------------|-------------------|---------------------------------------|---------------------------------------|-----------------|
| 0             | 27.8              | -3.30                                 | 27.33                                 | —               |
| 1             | 33.4              | -1.31                                 | 21.37                                 | —               |
| 2             | 37.4              | -0.33                                 | 18.49                                 | —               |
| 3             | 37.6              | 0.18                                  | 19.78                                 | 108.99          |
| 3.25          | 34.5              | 0.62                                  | 22.70                                 | 36.66           |
| 3.5           | 31.4              | 2.18                                  | 23.59                                 | 10.82           |
| 4             | 39.2              | 3.68                                  | 15.33                                 | 4.17            |
| 4.75          | 46.7              | 3.99                                  | 11.37                                 | 2.85            |
| 5             | 48.4              | 4.01                                  | 10.79                                 | 2.69            |

Table S5. Change of crystal cell parameters of the calcium formate  $\beta$ -phase crystals at hydrostatic compression.

| Pressure,<br>GPa | a, Å   | c, Å   | V <sub>cell</sub> , Å <sup>3</sup> |
|------------------|--------|--------|------------------------------------|
| 0                | 6.8978 | 9.0566 | 430.9068                           |
| 0.5              | 6.8814 | 8.9477 | 423.7067                           |
| 1                | 6.8669 | 8.8504 | 417.3361                           |
| 1.5              | 6.8530 | 8.7648 | 411.6207                           |
| 2                | 6.8399 | 8.6860 | 406.3614                           |
| 3                | 6.8153 | 8.5454 | 396.9265                           |
| 4                | 6.7927 | 8.4208 | 388.5450                           |
| 5                | 6.7720 | 8.3040 | 380.8188                           |
| 6                | 6.7576 | 8.1719 | 373.1711                           |

Table S6. Linear compressibility and bulk modulus values of the calcium formate  $\beta$ -phase crystals at hydrostatic compression.

| Pressure,<br>GPa | Bulk<br>modulus,<br>GPa | LC <sub>min</sub> ,<br>TPa <sup>-1</sup> | LC <sub>max</sub> ,<br>TPa <sup>-1</sup> | A <sub>LC</sub> |
|------------------|-------------------------|------------------------------------------|------------------------------------------|-----------------|
| 0                | 33.2                    | 4.66                                     | 26.13                                    | 5.61            |
| 0.5              | 36.2                    | 4.50                                     | 22.90                                    | 5.09            |
| 1                | 39.0                    | 4.33                                     | 20.58                                    | 4.76            |
| 1.5              | 41.7                    | 4.19                                     | 18.68                                    | 4.46            |
| 2                | 44.2                    | 4.06                                     | 17.27                                    | 4.26            |
| 3                | 44.4                    | 4.65                                     | 15.12                                    | 3.26            |
| 4                | 42.3                    | 5.69                                     | 13.18                                    | 2.32            |
| 5                | 40.4                    | 6.45                                     | 12.38                                    | 1.92            |
| 6                | 40.7                    | 6.10                                     | 12.80                                    | 2.10            |

Table S7. Change of crystal cell parameters of the cadmium formate crystals at hydrostatic compression.

| Pressure, GPa | a, Å    | b, Å   | c, Å    | $\beta$  | $V_{\text{cell}}, \text{\AA}^3$ |
|---------------|---------|--------|---------|----------|---------------------------------|
| 0             | 12.0265 | 6.0878 | 12.5605 | 117.1681 | 818.1553                        |
| 0.1           | 12.0119 | 6.0807 | 12.5559 | 117.3124 | 814.8591                        |
| 0.25          | 11.9932 | 6.0708 | 12.5472 | 117.5097 | 810.2574                        |
| 0.35          | 11.9811 | 6.0640 | 12.5417 | 117.6362 | 807.2531                        |
| 0.5           | 11.9630 | 6.0542 | 12.5336 | 117.8199 | 802.8452                        |
| 1             | 11.9054 | 6.0244 | 12.5076 | 118.3706 | 789.3341                        |
| 1.5           | 11.8512 | 5.9997 | 12.4805 | 118.8532 | 777.2328                        |
| 2             | 11.7986 | 5.9773 | 12.4544 | 119.2724 | 766.1765                        |
| 2.5           | 11.7494 | 5.9577 | 12.4282 | 119.6455 | 756.0930                        |
| 3             | 11.7033 | 5.9409 | 12.4006 | 119.9838 | 746.7992                        |

Table S8. Linear compressibility and bulk modulus values of the cadmium formate crystals at hydrostatic compression.

| Pressure, GPa | Bulk modulus, GPa | $LC_{\text{min}}, \text{TPa}^{-1}$ | $LC_{\text{max}}, \text{TPa}^{-1}$ | $A_{LC}$ |
|---------------|-------------------|------------------------------------|------------------------------------|----------|
| 0             | 28.7              | -1.23                              | 30.32                              | —        |
| 0.1           | 29.2              | -0.80                              | 29.08                              | —        |
| 0.25          | 30.0              | -0.26                              | 27.41                              | —        |
| 0.35          | 30.5              | 0.04                               | 26.57                              | 730.72   |
| 0.5           | 31.3              | 0.42                               | 25.30                              | 60.63    |
| 1             | 33.6              | 1.27                               | 22.48                              | 17.66    |
| 1.5           | 35.9              | 1.80                               | 20.52                              | 11.38    |
| 2             | 38.1              | 2.19                               | 18.93                              | 8.63     |
| 2.5           | 40.3              | 2.49                               | 17.54                              | 7.05     |
| 3             | 42.5              | 2.73                               | 16.31                              | 5.98     |

Table S9. Change of crystal cell parameters of the sodium formate crystals at hydrostatic compression.

| Pressure,<br>GPa | a, Å   |      | b, Å   |      | c, Å   |      | $\beta$  |        | $V_{\text{cell}}, \text{\AA}^3$ |       |
|------------------|--------|------|--------|------|--------|------|----------|--------|---------------------------------|-------|
|                  | calc   | exp  | calc   | exp  | calc   | exp  | calc     | exp    | calc                            | exp   |
| 0                | 6.1642 | 6.24 | 6.8997 | 6.75 | 6.0474 | 6.10 | 117.1374 | 116.61 | 228.8847                        | 229.5 |
| 0.1              | 6.1640 | 6.25 | 6.8852 | 6.75 | 6.0395 | 6.17 | 117.1936 | 116.09 | 227.9867                        | 234   |
| 0.5              | 6.1677 | 6.25 | 6.8240 | 6.68 | 6.0088 | 6.14 | 117.4295 | –      | 224.4686                        | 230   |
| 1                | 6.1797 | 6.25 | 6.7414 | 6.61 | 5.9730 | 6.10 | 117.7461 | 117.00 | 220.2269                        | 225   |
| 1.5              | 6.1896 | 6.25 | 6.6682 | 6.57 | 5.9388 | 6.07 | 118.0477 | –      | 216.3281                        | 223   |
| 2                | 6.1940 | 6.24 | 6.6076 | 6.53 | 5.9063 | 6.05 | 118.2893 | –      | 212.8576                        | 219   |
| 3                | 6.1973 | 6.23 | 6.5046 | 6.46 | 5.8461 | 6.00 | 118.6820 | –      | 206.7451                        | 214   |
| 3.5              | 6.1992 | 6.21 | 6.4570 | 6.42 | 5.8178 | 5.98 | 118.8579 | 117.86 | 203.9586                        | 211   |
| 4                | 6.2031 | 6.20 | 6.4093 | 6.40 | 5.7889 | 5.96 | 119.0382 | –      | 201.2190                        | 208   |
| 4.5              | 6.2228 | 6.19 | 6.3435 | 6.38 | 5.7500 | 5.94 | 119.3536 | –      | 197.8364                        | 207   |
| 5                | 6.2260 | 6.17 | 6.3022 | 6.37 | 5.7253 | 5.91 | 119.5532 | –      | 195.4198                        | 204   |
| 5.5              | 6.2255 | 6.15 | 6.2671 | 6.36 | 5.7043 | 5.89 | 119.7244 | –      | 193.2730                        | 202   |
| 6                | 6.2235 | –    | 6.2354 | –    | 5.6851 | –    | 119.8789 | –      | 191.2929                        | –     |
| 7                | 6.2178 | –    | 6.1791 | –    | 5.6501 | –    | 120.1524 | –      | 187.7065                        | –     |

Note. Experimental data on crystals under pressure are taken from [10].

Table S10. Linear compressibility and bulk modulus values of the sodium formate crystals at hydrostatic compression.

| Pressure,<br>GPa | Bulk<br>modulus,<br>GPa | $LC_{\text{min}},$<br>$\text{TPa}^{-1}$ | $LC_{\text{max}},$<br>$\text{TPa}^{-1}$ | $A_{LC}$ |
|------------------|-------------------------|-----------------------------------------|-----------------------------------------|----------|
| 0                | 27.6                    | -0.05                                   | 21.73                                   | –        |
| 0.1              | 27.9                    | -0.46                                   | 21.98                                   | –        |
| 0.5              | 29.1                    | -2.37                                   | 23.58                                   | –        |
| 1                | 30.7                    | -3.16                                   | 23.25                                   | –        |
| 1.5              | 33.1                    | -1.08                                   | 19.23                                   | –        |
| 2                | 35.3                    | -0.02                                   | 16.76                                   | –        |
| 3                | 38.9                    | 0.10                                    | 14.87                                   | 151.26   |
| 3.5              | 40.2                    | -0.23                                   | 14.64                                   | –        |
| 4                | 39.0                    | -2.13                                   | 16.60                                   | –        |
| 4.5              | 39.8                    | -2.51                                   | 16.56                                   | –        |
| 5                | 45.5                    | 0.22                                    | 12.33                                   | 56.19    |
| 5.5              | 48.4                    | 0.77                                    | 11.12                                   | 14.43    |
| 6                | 50.9                    | 1.07                                    | 10.26                                   | 9.60     |
| 7                | 55.5                    | 1.34                                    | 9.20                                    | 6.87     |



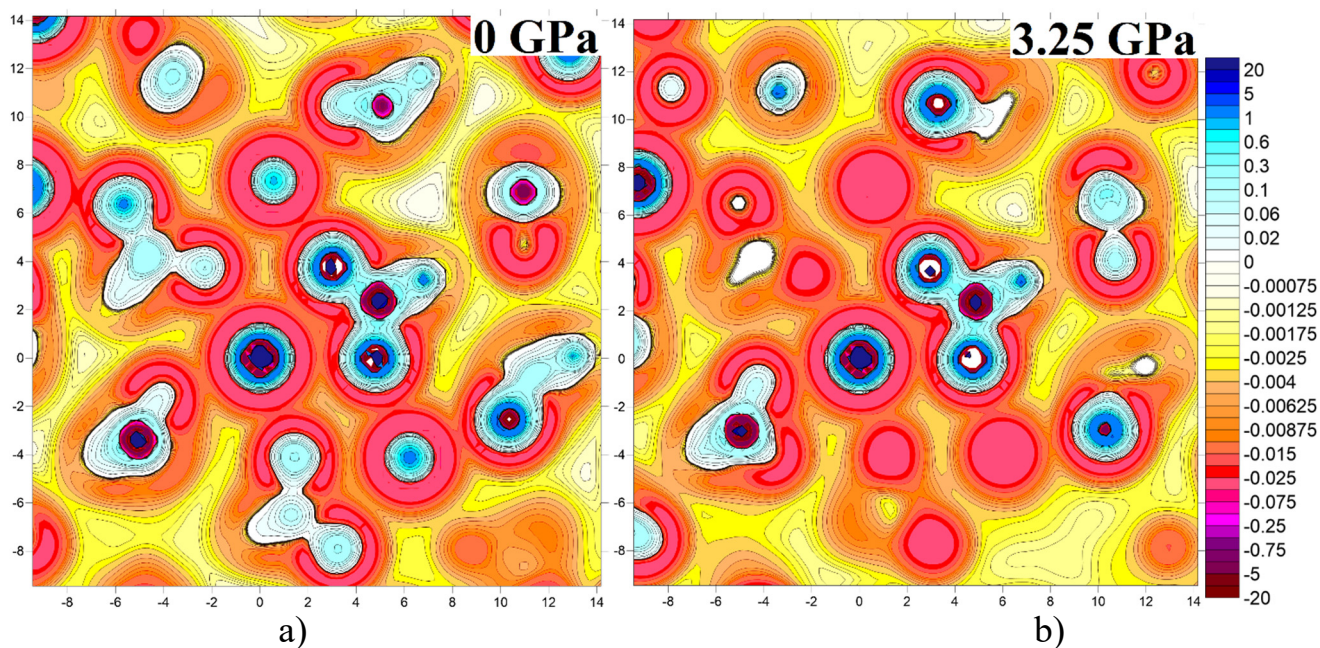

Figure S4. Contour maps of  $p(\mathbf{r})$  distribution in Ca...O...O plane a) in equilibrium structure and b) under the hydrostatic pressure in 3.25 GPa in  $\alpha$ -Ca<sup>2+</sup>fnt.

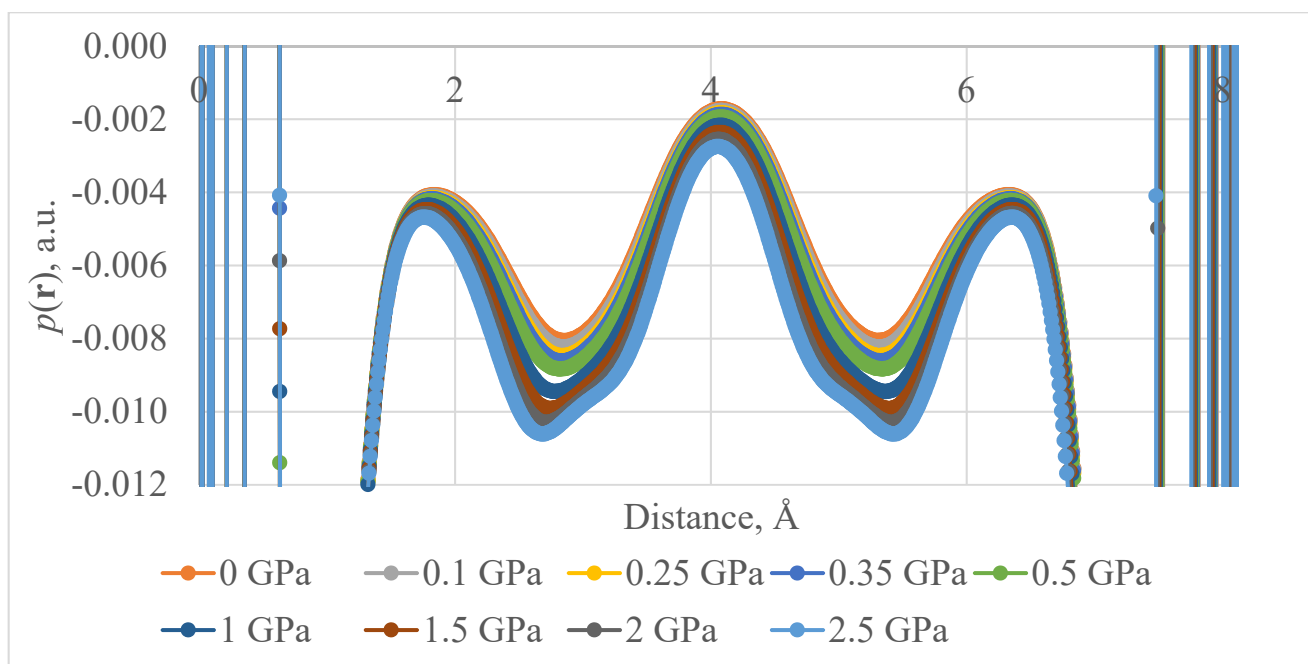

Figure S5. Change of  $p(\mathbf{r})$  along the  $LC_{\min}$  axis between Cd<sup>2+</sup> ions in Cd<sup>2+</sup>fnt with increasing hydrostatic compression.

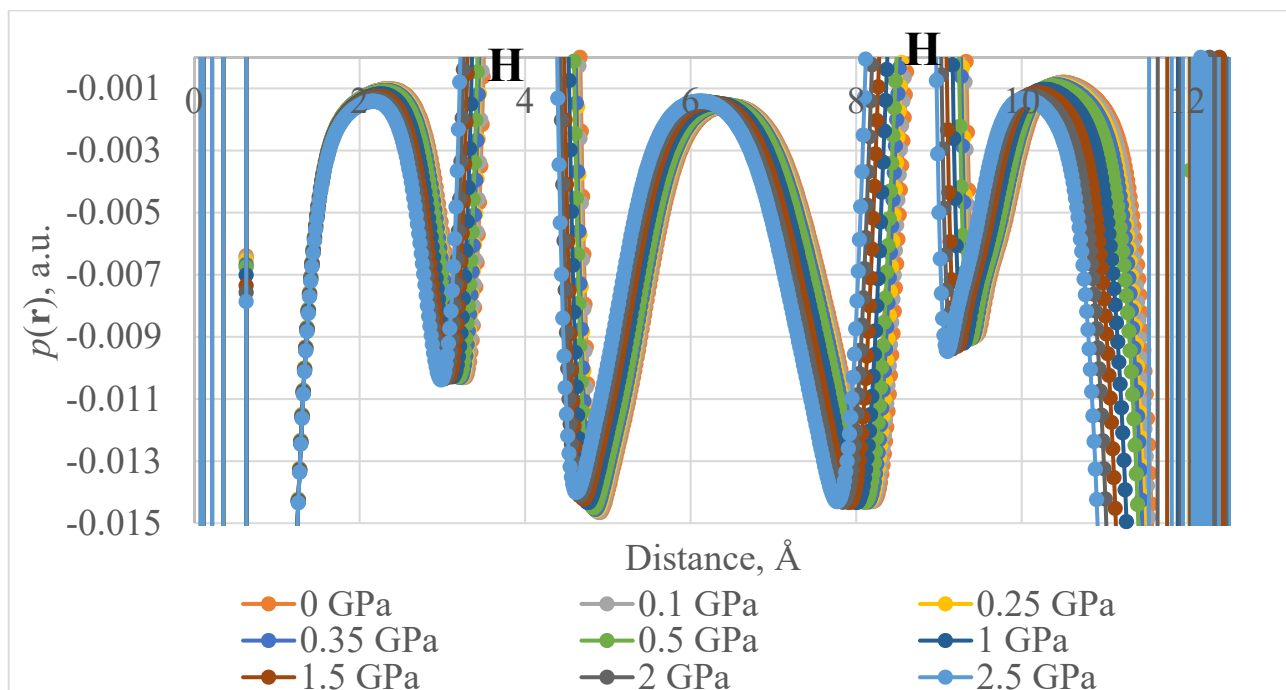

Figure S6. Change of  $p(r)$  along  $LC_{\max}$  axis between  $Cd^{2+}$  ions in  $Cd^{2+}fmt$  with increasing hydrostatic compression.

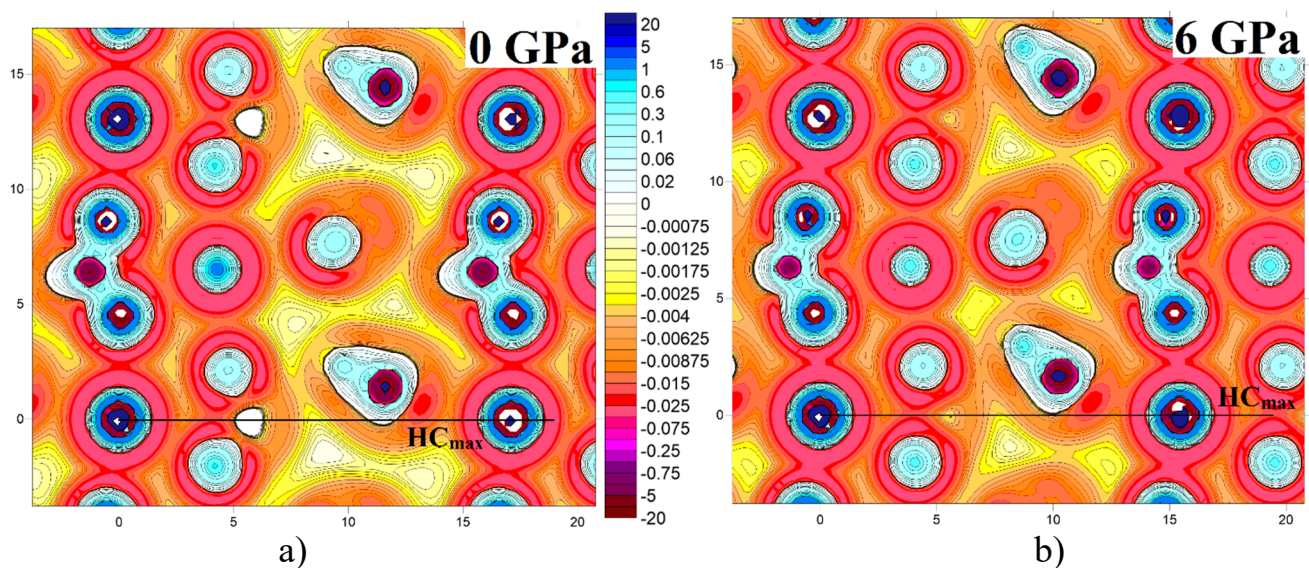

Figure S7. Contour maps of  $p(r)$  distribution in  $Ca...Ca...Ca$  plane, coplanar  $LC_{\max}$ , a) in equilibrium structure and b) under hydrostatic pressure in 6 GPa in  $\beta-Ca^{2+}fmt$ .

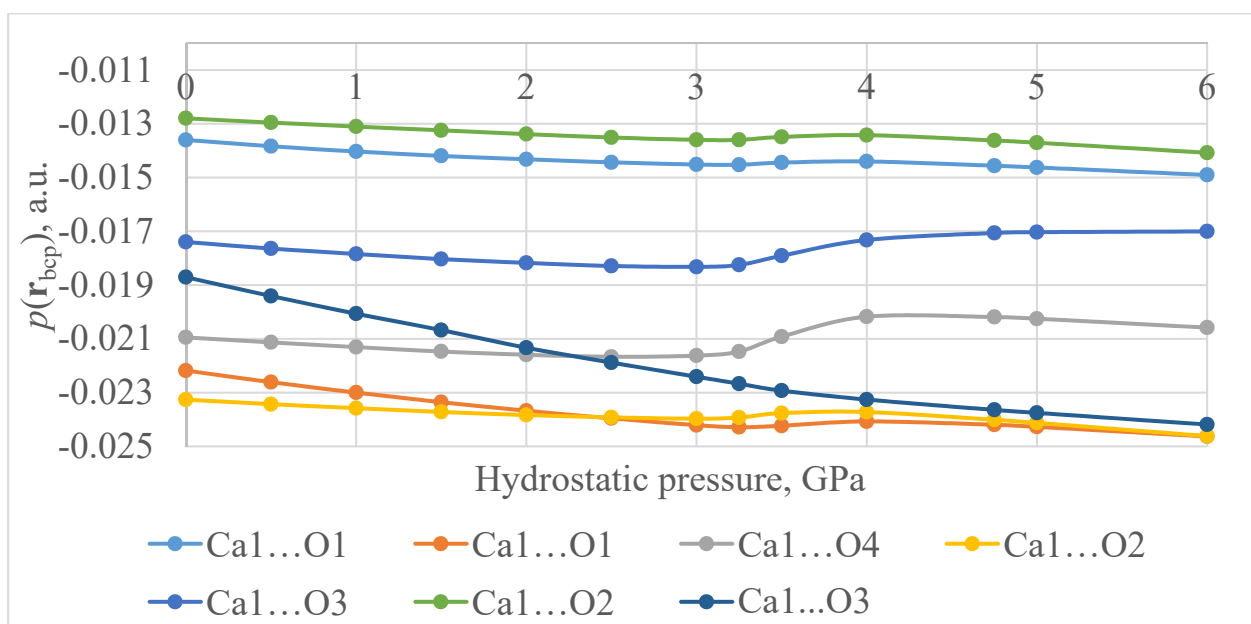

Figure S8. Change of  $p(r_{bcp})$  of Ca...O ionic bonds in  $\alpha$ -Ca<sup>2+</sup>fmt with increasing hydrostatic pressure.

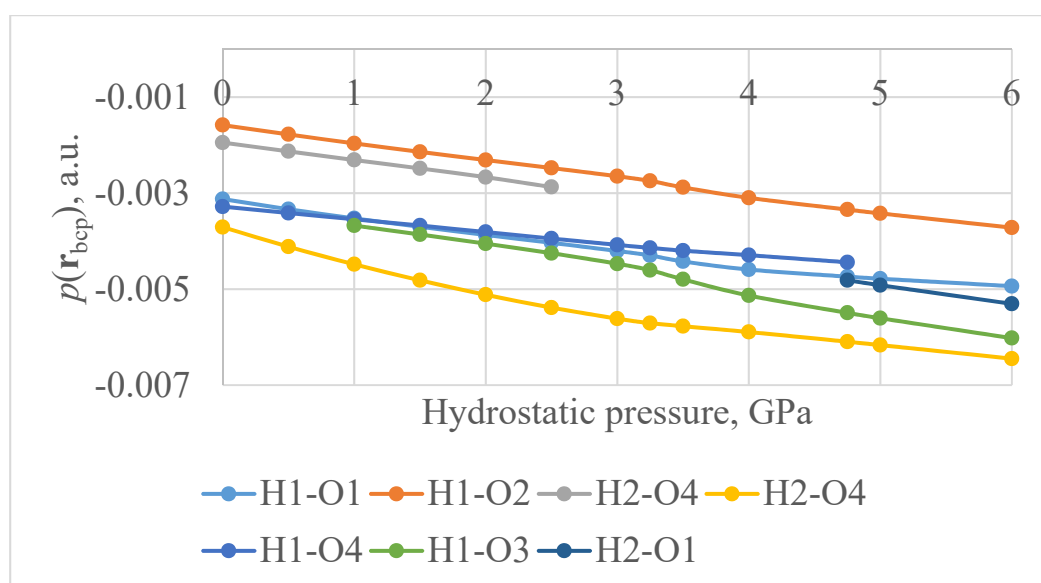

Figure S9. Change of  $p(r_{bcp})$  of H...O hydrogen bonds in  $\alpha$ -Ca<sup>2+</sup>fmt with increasing hydrostatic pressure.

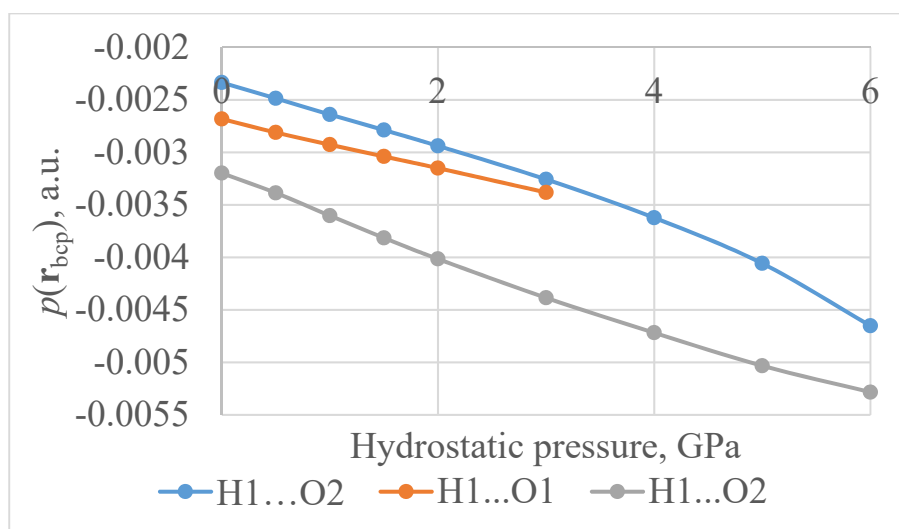

Figure S10. Change of  $p(r_{\text{bcp}})$  of H...O hydrogen bonds in  $\beta\text{-Ca}^{2+}\text{fmt}$  with increasing hydrostatic pressure.

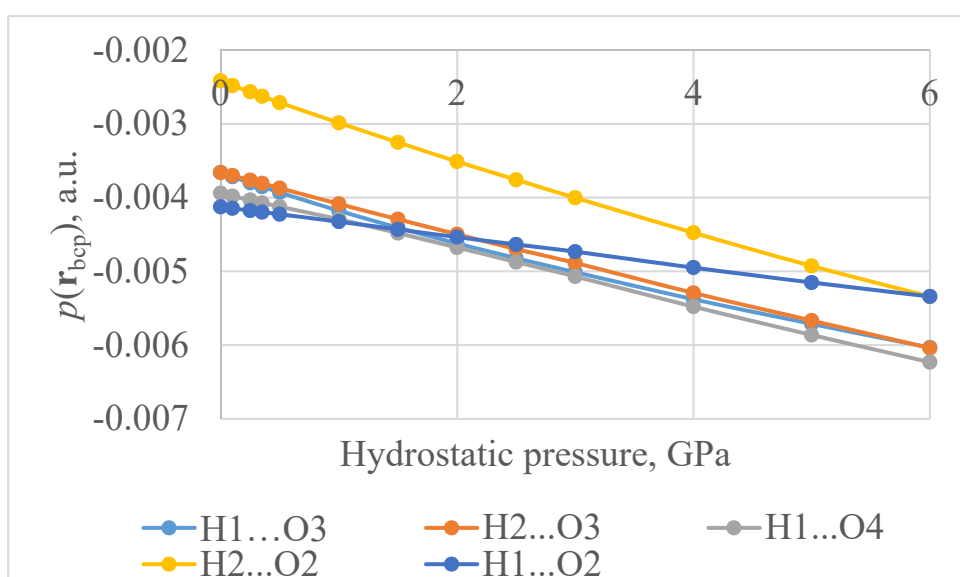

Figure S11. Change of  $p(r_{\text{bcp}})$  of H...O hydrogen bonds in  $\text{Cd}^{2+}\text{fmt}$  with increasing hydrostatic pressure.

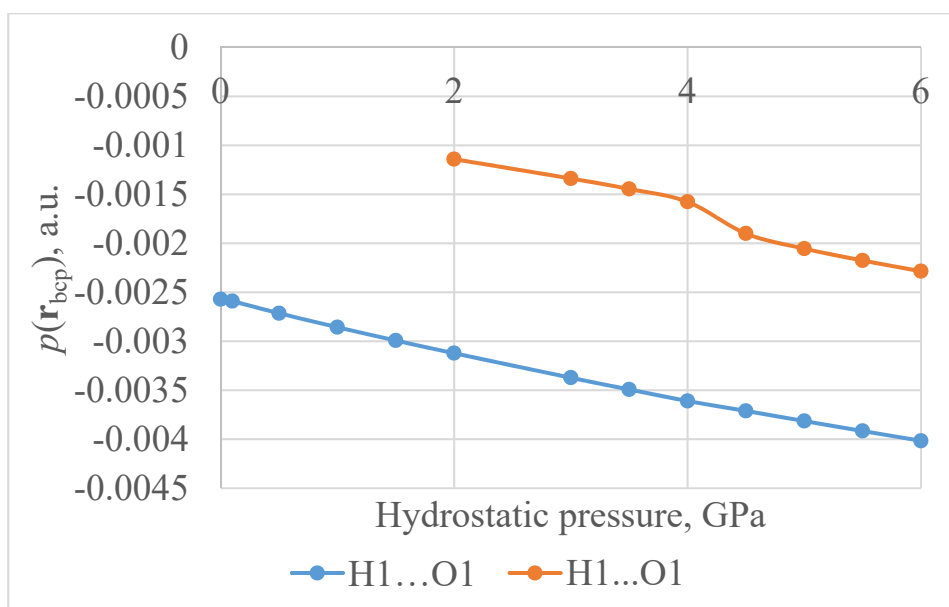

Figure S12. Change of  $p(r_{bcp})$  of H...O hydrogen bonds in  $\text{Na}^+\text{fmt}$  with increasing hydrostatic pressure.

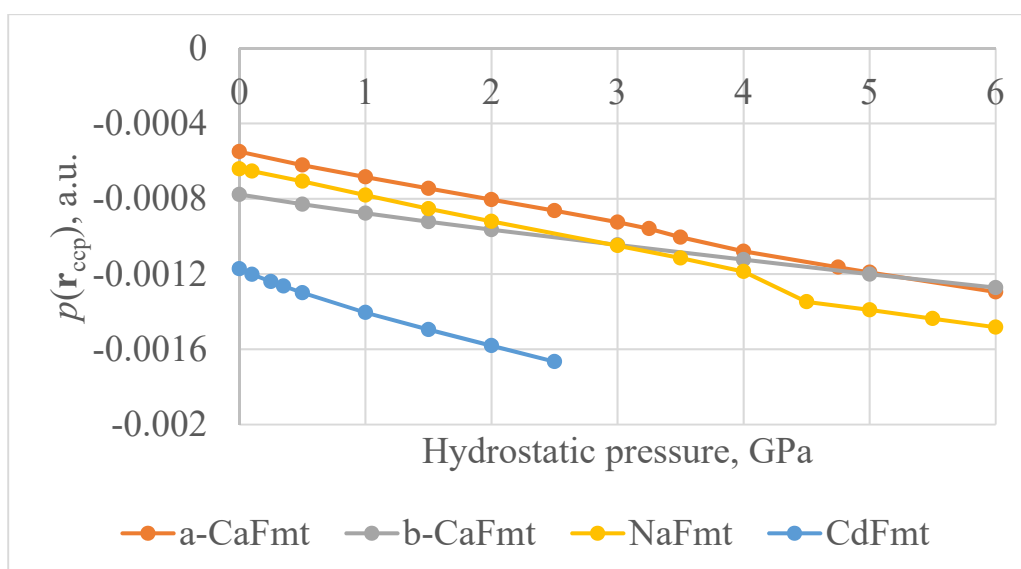

Figure S13. Change of  $p(r_{ccp})$  in formate crystals with increasing hydrostatic pressure.

Table S11. Values of absolute change of  $p(\mathbf{r})$ ,  $\Delta p$ , and relative change,  $\Delta p\%$  of ionic bonds with increasing hydrostatic compression up to 6 GPa.

| <b><math>\alpha</math>-Ca<sup>2+</sup>fmt</b> |                |              |
|-----------------------------------------------|----------------|--------------|
| Bond                                          | $\Delta p$     | $\Delta p\%$ |
| Ca <sub>1</sub> ...O <sub>1</sub>             | 0.0013         | 9.8          |
| Ca <sub>1</sub> ...O <sub>1</sub>             | 0.0024         | 11.04        |
| Ca <sub>1</sub> ...O <sub>4</sub>             | 0.00036        | 1.74         |
| Ca <sub>1</sub> ...O <sub>2</sub>             | 0.0014         | 5.82         |
| Ca <sub>1</sub> ...O <sub>3</sub>             | 0.0004         | 2.26         |
| Ca <sub>1</sub> ...O <sub>2</sub>             | 0.0013         | 10.01        |
| Ca <sub>1</sub> ...O <sub>3</sub>             | <b>0.0055</b>  | <b>29.30</b> |
| <b><math>\beta</math>-Ca<sup>2+</sup>fmt</b>  |                |              |
| Bond                                          | $\Delta p$     | $\Delta p\%$ |
| Ca <sub>1</sub> ...O <sub>2</sub>             | 0.0029         | <b>40.02</b> |
| Ca <sub>1</sub> ...O <sub>1</sub>             | 0.0021         | 14.66        |
| Ca <sub>1</sub> ...O <sub>1</sub>             | <b>0.0043</b>  | 20.11        |
| Ca <sub>1</sub> ...O <sub>2</sub>             | 0.0042         | 17.76        |
| <b>Na<sup>+</sup>fmt</b>                      |                |              |
| Bond                                          | $\Delta p$     | $\Delta p\%$ |
| Na <sub>1</sub> ...O <sub>1</sub>             | 0.0032         | 37.53        |
| Na <sub>1</sub> ...O <sub>1</sub>             | <b>0.0047</b>  | <b>49.40</b> |
| Na <sub>1</sub> ...O <sub>1</sub>             | 0.0042         | 37.39        |
| <b>Cd<sup>2+</sup>fmt</b>                     |                |              |
| Bond                                          | $\Delta p$     | $\Delta p\%$ |
| Cd <sub>1</sub> ...O <sub>3</sub>             | -0.0024        | <b>27.60</b> |
| Cd <sub>1</sub> ...O <sub>4</sub>             | -0.0011        | 1.98         |
| Cd <sub>1</sub> ...O <sub>1</sub>             | -0.0025        | 12.14        |
| Cd <sub>1</sub> ...O <sub>4</sub>             | <b>-0.0046</b> | 21.42        |
| Cd <sub>1</sub> ...O <sub>1</sub>             | -0.0009        | 4.05         |
| Cd <sub>1</sub> ...O <sub>2</sub>             | -0.0017        | 6.84         |
| Cd <sub>1</sub> ...O <sub>3</sub>             | -0.0039        | 15.29        |

Table S12. Values of absolute change of  $p(\mathbf{r})$ ,  $\Delta p$ , and relative change,  $\Delta p\%$  of hydrogen bonds with increasing hydrostatic compression up to 6 GPa.

| <b><math>\alpha</math>-Ca<sup>2+</sup>fmt</b> |                |               |
|-----------------------------------------------|----------------|---------------|
| Bond                                          | $\Delta p$     | $\Delta p\%$  |
| H <sub>1</sub> -O <sub>1</sub>                | -0.0018        | 58.05         |
| H <sub>1</sub> -O <sub>2</sub>                | -0.0021        | <b>135.13</b> |
| H <sub>2</sub> -O <sub>4</sub>                | <b>-0.0027</b> | 73.93         |
| <b><math>\beta</math>-Ca<sup>2+</sup>fmt</b>  |                |               |
| Bond                                          | $\Delta p$     | $\Delta p\%$  |
| H <sub>1</sub> -O <sub>2</sub>                | <b>-0.0023</b> | <b>99.20</b>  |
| H <sub>1</sub> -O <sub>2</sub>                | -0.0021        | 65.20         |
| <b>Na<sup>+</sup>fmt</b>                      |                |               |
| Bond                                          | $\Delta p$     | $\Delta p\%$  |
| H <sub>1</sub> -O <sub>1</sub>                | <b>0.0014</b>  | <b>56.19</b>  |
| <b>Cd<sup>2+</sup>fmt</b>                     |                |               |
| Bond                                          | $\Delta p$     | $\Delta p\%$  |
| H <sub>1</sub> -O <sub>3</sub>                | -0.0024        | 64.85         |
| H <sub>2</sub> -O <sub>3</sub>                | -0.0024        | 65.00         |
| H <sub>1</sub> -O <sub>4</sub>                | -0.0023        | 58.19         |
| H <sub>2</sub> -O <sub>2</sub>                | <b>-0.0029</b> | <b>121.18</b> |
| H <sub>1</sub> -O <sub>2</sub>                | -0.0012        | 29.43         |

Table S13. Bond lengths, Å, for M...O and H...O bonds estimated by various calculation methods.

| <b><math>\alpha</math>-Ca<sup>2+</sup>Fmt</b> |                                         |                                             |                         |
|-----------------------------------------------|-----------------------------------------|---------------------------------------------|-------------------------|
| Bond                                          | PBE0/pob-DZVP_rev2                      | HSE06/pob-DZVP_rev2                         | Experimental (CAFORM)   |
| Ca1...O1                                      | 2.529                                   | 2.530                                       | 2.481                   |
| Ca1...O1                                      | 2.370                                   | 2.370                                       | 2.366                   |
| Ca1...O4                                      | 2.374                                   | 2.374                                       | 2.319                   |
| Ca1...O2                                      | 2.352                                   | 2.351                                       | 2.287                   |
| Ca1...O3                                      | 2.436                                   | 2.436                                       | 2.458                   |
| Ca1...O2                                      | 2.554                                   | 2.555                                       | 2.599                   |
| Ca1...O3                                      | 2.418                                   | 2.419                                       | 2.410                   |
| H1...O1                                       | 2.647                                   | 2.649                                       | 2.515                   |
| H1...O2                                       | 3.187                                   | 3.190                                       | 3.193                   |
| H2...O4                                       | 2.416                                   | 2.415                                       | 2.584                   |
| <b><math>\beta</math>-Ca<sup>2+</sup>Fmt</b>  |                                         |                                             |                         |
| Bond                                          | PBE0/pob-DZVP_rev2                      | -                                           | Experimental (CAFORM05) |
| Ca1...O2                                      | 2.822                                   | -                                           | 2.944                   |
| Ca1...O1                                      | 2.511                                   | -                                           | 2.484                   |
| Ca1...O1                                      | 2.375                                   | -                                           | 2.364                   |
| Ca1...O2                                      | 2.347                                   | -                                           | 2.312                   |
| H1...O2                                       | 2.795                                   | -                                           | 2.960                   |
| H1...O2                                       | 2.725                                   | -                                           | 2.961                   |
| <b>Na<sup>+</sup>Fmt</b>                      |                                         |                                             |                         |
| Bond                                          | PBE0/pob-DZVP_rev2                      | -                                           | Experimental (NAFORM06) |
| Na1...O1                                      | 2.473                                   | -                                           | 2.492                   |
| Na1...O1                                      | 2.417                                   | -                                           | 2.419                   |
| Na1...O1                                      | 2.381                                   | -                                           | 2.386                   |
| H1...O1                                       | 2.683                                   | -                                           | 2.695                   |
| <b>Cd<sup>2+</sup>Fmt</b>                     |                                         |                                             |                         |
| Bond                                          | PBE0/pob-DZVP_rev2<br>(dou 1998 for Cd) | PBE0/pob_DZVP_rev2<br>(pob-DZVP ECP for Cd) | Experimental (ZZZSGO01) |
| Cd1...O3                                      | 2.709                                   | 2.844                                       | 2.599                   |
| Cd1...O4                                      | 2.403                                   | 2.332                                       | 2.586                   |
| Cd1...O1                                      | 2.370                                   | 2.336                                       | 2.323                   |
| Cd1...O4                                      | 2.367                                   | 2.346                                       | 2.285                   |
| Cd1...O1                                      | 2.339                                   | 2.305                                       | 2.304                   |
| Cd1...O2                                      | 2.292                                   | 2.252                                       | 2.259                   |
| Cd1...O3                                      | 2.314                                   | 2.282                                       | 2.275                   |
| H1...O3                                       | 2.625                                   | 2.575                                       | 2.686                   |
| H2...O3                                       | 2.768                                   | 2.753                                       | 3.064                   |
| H1...O4                                       | 2.511                                   | 2.510                                       | 2.598                   |
| H2...O2                                       | 2.682                                   | 2.653                                       | 2.865                   |
| H1...O2                                       | 2.650                                   | 2.621                                       | 2.688                   |



- 
- 1 Nye, J. F. *Physical Properties of Crystals*; Clarendon Press: Oxford, 1985.
  - 2 Gaillac, R.; Coudert, F.-X. ELATE: Elastic tensor analysis.—  
<http://progs.coudert.name/elate>. (accessed on 30 June 2023)
  - 3 Groom, C. R.; Bruno, I. J.; Lightfoot, M. P.; Ward, S. C., The Cambridge Structural Database. *Acta Crystallographica Section B* 2016, 72, (2), 171-179.
  - 4 Weber, G. The structure of anhydrous cadmium formate // *Acta Cryst. B*, 1980, B36, 1947-1949.
  - 5 H. Fuess, J. Willem Bats Comparison of Observed and Calculated Densities. XII. Deformation Density in Complex Anions. II. Experimental and Theoretical Densities in Sodium Formate // *Acta Cryst. B*, 1982, B38, 736-743.
  - 6 M. Matsui, T. Watanabé, N. Kamijo, R. L. Lapp and R. A. Jacobson The structures of calcium formate [beta]-Ca(HCOO)<sub>2</sub> and [delta]-Ca(HCOO)<sub>2</sub>, and the tetragonal mixed crystals Ca(HCOO)<sub>2</sub>-Sr(HCOO)<sub>2</sub> // *Acta Cryst. B*, 1980, B36, 1081-1086.
  - 7 R.H. Baughman, S. Stafström, C. Cui, S.O. Dantas Materials with Negative Compressibilities in One or More Dimensions // *Science*, 1998, 279, 5356, 1522-1524.
  - 8 Lei Kang, Shourui Li, Bo Wang, Xiaoshuang Li The effect of high pressure on the structure and stability of sodium formate: Probed by in situ synchrotron X-ray diffraction technique // *Solid State Communications*, 2019, 289, 67-70.
